# Supplementary material for: Lactobacillus rhamnosus GG in the Primary Prevention of Eczema in Children: A Systematic Review and Meta-Analysis
Source: MDPI journal article supplement (doi:10.3390/nu10091319), 2018-09-18
Supplement: s1 [file s1]

**Figure S1.**

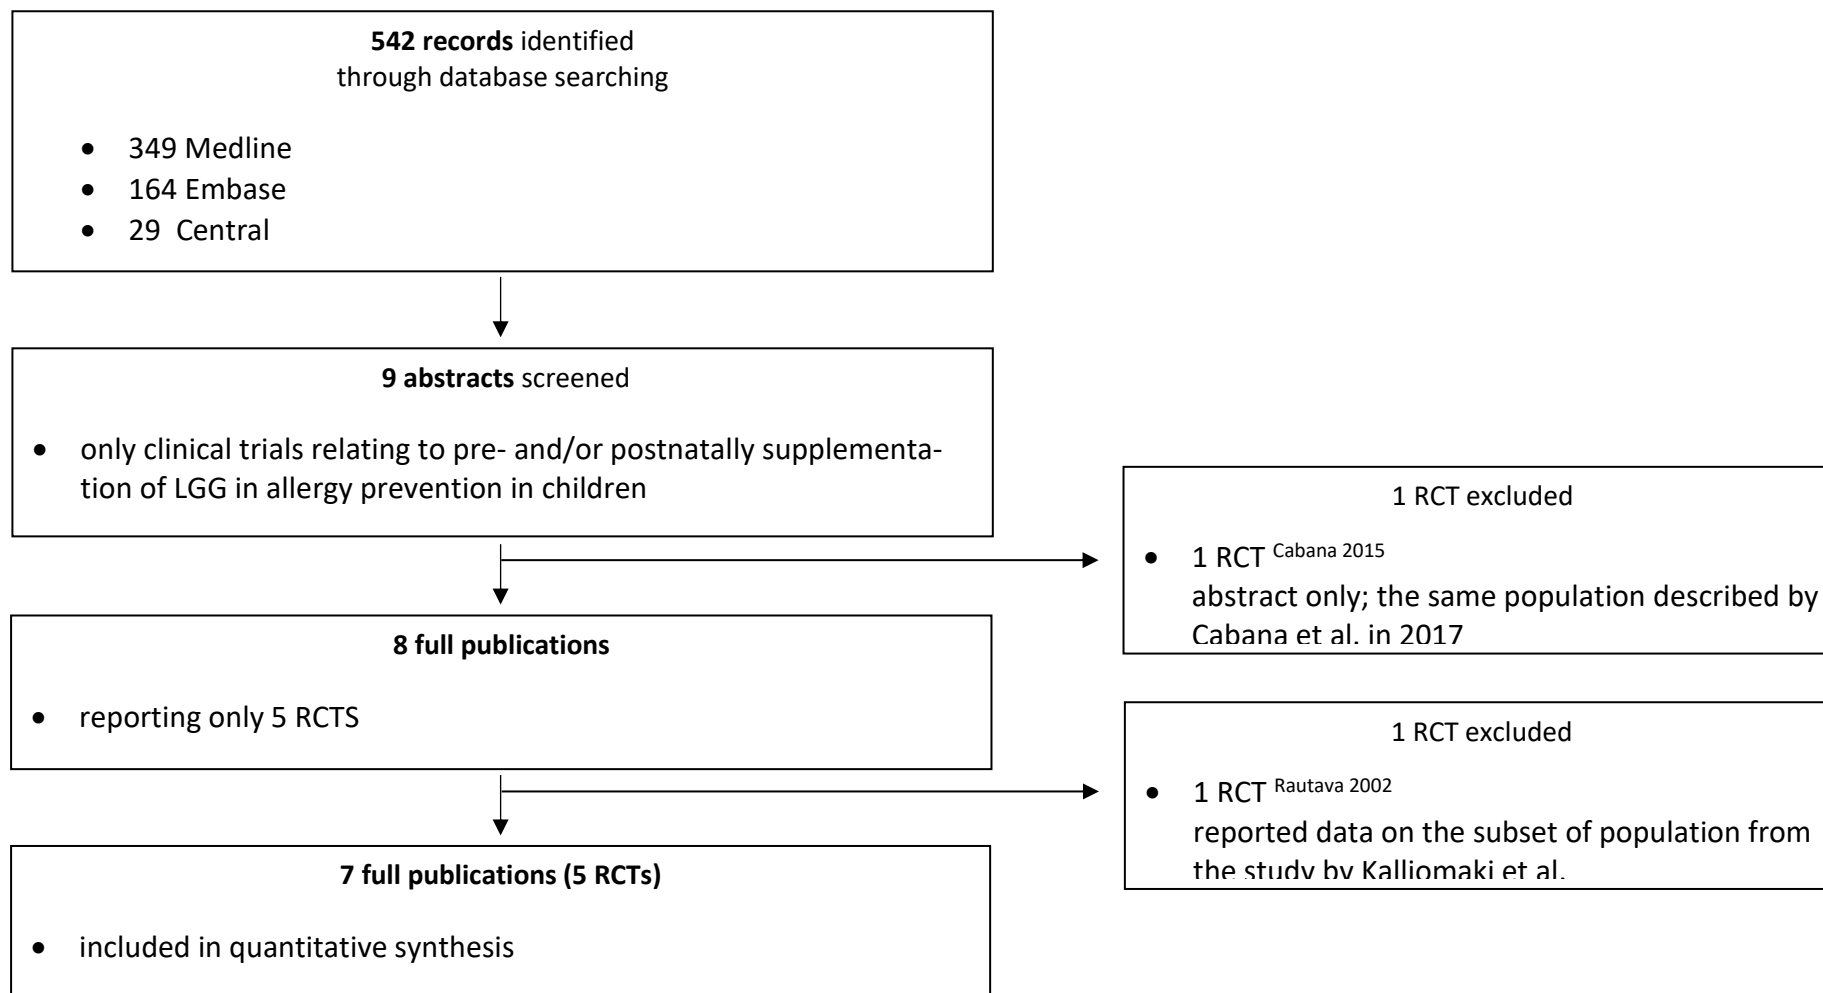

## Table S1

[illegible]

|                                                                                      |         |                                                                                                                                    |                                              |                                   |                                                                                     |     |                                                                                                                                                                                                                                                                                                                                                                                                                                   |                                                                                                                                                                        |     |                  |
|--------------------------------------------------------------------------------------|---------|------------------------------------------------------------------------------------------------------------------------------------|----------------------------------------------|-----------------------------------|-------------------------------------------------------------------------------------|-----|-----------------------------------------------------------------------------------------------------------------------------------------------------------------------------------------------------------------------------------------------------------------------------------------------------------------------------------------------------------------------------------------------------------------------------------|------------------------------------------------------------------------------------------------------------------------------------------------------------------------|-----|------------------|
| <b>Cabana 2017</b>                                                                   | USA     | Newborns [participants with at least 1 biological parent who reported a history of asthma]                                         | $1.0 \times 10^9$ CFU + inulin 225 mg (n=92) | Inulin 325 mg (n=92)              | for the first 6 mo of life (added to human milk, pHF, water)                        | 5 y | <p><i>Eczema</i> – repeated parental reports of the diagnosis of eczema by a clinician on 2 occasions or the presence of eczema on physical examination on the basis of standard criteria</p> <p><i>Asthma and AR</i> – repeated parental reports of the diagnosis by a clinician on 2 occasions</p>                                                                                                                              | <p>*the incidence of eczema within 2 y of birth</p> <p>**the incidences of asthma and AR within 5 y of birth</p>                                                       | Yes | Yes <sup>2</sup> |
| <b>PRE- (pregnant women) AND POSTNATALLY (breastfeeding mothers and/or newborns)</b> |         |                                                                                                                                    |                                              |                                   |                                                                                     |     |                                                                                                                                                                                                                                                                                                                                                                                                                                   |                                                                                                                                                                        |     |                  |
| <b>Kalliomaki 2001</b>                                                               | Finland | pregnant women and their infants [one or more family members (mother, father, or older sibling) with atopic eczema, AR, or asthma] | $1 \times 10^{10}$ CFU (n=77)                | Microcrystalline cellulose (n=82) | 2 to 4 wk before delivery + 6 mo postnatally (BF women or infants – added to water) | 2 y | <p><i>Eczema</i> – chronic recurring atopic eczema (pruritis, facial or extensor involvement, or both, and chronic relapsing course)</p> <p><i>AR</i> – 2 or more of chronic, recurring symptoms: nasal discharge, blockage, sneezing, and itching</p> <p><i>Asthma</i> – a chronic or recurrent cough, wheeze or shortness of breath, or both, if other diagnoses were excluded and trial antiasthma treatment was effective</p> | <p>* the frequency of atopic eczema at 2 y of life</p> <p>** the frequency of asthma and AR at 2 y of life; sensitization (total and specific IgE; SPT reactivity)</p> | Yes | Yes <sup>3</sup> |

|                        |         |                                                                                                                                                                                       |                                              |                                   |                                                                                                                                    |       |                                                                                                                                                                                                                                                                              |                                                                                                                                                                                                   |     |                   |
|------------------------|---------|---------------------------------------------------------------------------------------------------------------------------------------------------------------------------------------|----------------------------------------------|-----------------------------------|------------------------------------------------------------------------------------------------------------------------------------|-------|------------------------------------------------------------------------------------------------------------------------------------------------------------------------------------------------------------------------------------------------------------------------------|---------------------------------------------------------------------------------------------------------------------------------------------------------------------------------------------------|-----|-------------------|
|                        |         |                                                                                                                                                                                       |                                              |                                   |                                                                                                                                    |       | <i>Atopic sensitisation – positive skin-prick test or positive RAST, or both</i>                                                                                                                                                                                             |                                                                                                                                                                                                   |     |                   |
| <b>Kalliomaki 2003</b> |         |                                                                                                                                                                                       |                                              |                                   |                                                                                                                                    | 4 y   |                                                                                                                                                                                                                                                                              |                                                                                                                                                                                                   |     | Yes <sup>3b</sup> |
| <b>Kalliomaki 2007</b> |         |                                                                                                                                                                                       |                                              |                                   |                                                                                                                                    | 7 y   |                                                                                                                                                                                                                                                                              |                                                                                                                                                                                                   |     | Yes <sup>3c</sup> |
| <b>Kopp 2008</b>       | Germany | pregnant women and their infants [≥1 family member (eg. mother, father, or sibling) with AD, AR or asthma and a confirmed allergic sensitization against an inhalant allergen]        | 5.0 x 10 <sup>9</sup> CFU twice daily (n=54) | Microcrystalline cellulose (n=51) | for 4 – 6 w before delivery + 6 mo postnatally (3 mo BF women + 3 mo infants – added to water)                                     | 2 y   | AD – pruritus, facial or extensor involvement, or both, and chronic relapsing course – which was fulfilled if the child had had eczema for >1 mo<br><br><i>Recurrent Obstructive Bronchitis – ≥ 5 episodes of wheezing bronchitis during the first 2 years</i>               | *the manifestation of AD at 2 y of life;<br><br>**eczema severity; Recurrent obstructive bronchitis                                                                                               | Yes | Yes <sup>4</sup>  |
| <b>Ou 2012</b>         | Taiwan  | pregnant women and their infants [one family member (mother, father, or older sibling) with AD, AR, or asthma, and confirmed allergic sensitization against one or more of the common | 1 x 10 <sup>10</sup> CFU (n=95)              | Microcrystalline cellulose (n=96) | from 24 w gestation (second trimester) until delivery + 6 mo postnatally (BF women or non-breastfeeding neonates – added to water) | 36 mo | AD – chronic or relapsing dermatitis with erythematous, scaly, or itchy rashes distributed on the face, neck, anterior chest wall, extensor areas or the flexural fold of extremities<br><br>AR – sneezing, running/blocked nose, or itchy eyes, in the absence of infection | * the point and cumulative prevalence of sensitization and developing of allergic diseases (AD, AR, asthma)<br><br>** improvement of maternal allergic symptom score and plasma immune parameters | Yes | No data           |

|  |  |                               |  |  |  |  |                                                                                                                                                                                                     |  |  |  |
|--|--|-------------------------------|--|--|--|--|-----------------------------------------------------------------------------------------------------------------------------------------------------------------------------------------------------|--|--|--|
|  |  | allergen in the study region] |  |  |  |  | <i>Asthma</i> – recurrent, ≥3 episodes of wheezing/ coughing, requiring bronchodilator treatment<br><br><i>Allergic sensitization</i> – positive specific IgE (> 0.7 kU/L) for one or more allergen |  |  |  |
|--|--|-------------------------------|--|--|--|--|-----------------------------------------------------------------------------------------------------------------------------------------------------------------------------------------------------|--|--|--|

<sup>1</sup> supported by Jack Brockhoff Foundation, the Murdoch Children’s Research Institute, the Australian National Health and Medical Research Council and the Ilhan Food Allergy Foundation

<sup>2</sup> supported by the Clinical and Translational Science Institute (UL1 RR024131) at the University of California, San Francisco, and by the National Institutes of Health, HL 080074; Industry provided study products (eg. LGG and placebo capsules; pHF)

<sup>3a</sup> supported by the Finnish Foundation for Paediatric Research, the National Technology Agency of Finland, and the Allergy Research Foundation in southwest Finland; <sup>3b</sup> supported by the grants from the Academy of Finland and Turku University Hospital (EVO Fund); <sup>3c</sup> supported by the European Union (Early Nutrition Programming Project [EARNEST]), the Academy of Finland, and Turku University Hospital

<sup>4</sup> supported by the University of Freiburg and by Infectopharm (Heppenheim, Germany)

AD – atopic diseases; AR – atopic rhinitis; BF – breastfeeding; CBMC – cord blood mononuclear cells; DC – dendritic cell; Treg – lymphocytes T regulatory; RAST – radioallergosorbent assay; SPT – skin prick;

Table S2

| Certainty assessment                                                 |                   |                      |               |                      |                              |                      | № of patients  |                | Effect                    |                                                     | Certainty        |
|----------------------------------------------------------------------|-------------------|----------------------|---------------|----------------------|------------------------------|----------------------|----------------|----------------|---------------------------|-----------------------------------------------------|------------------|
| № of studies                                                         | Study design      | Risk of bias         | Inconsistency | Indirectness         | Imprecision                  | Other considerations | LGG            | Control        | Relative (95% CI)         | Absolute (95% CI)                                   |                  |
| Eczema - overall - LGG during pregnancy only - eczema 2 y            |                   |                      |               |                      |                              |                      |                |                |                           |                                                     |                  |
| 1                                                                    | randomized trials | not serious          | not serious   | not serious          | not serious                  | none                 | 42/122 (34.4%) | 47/120 (39.2%) | RR 0.88<br>(0.63 to 1.22) | 47 fewer per 1 000<br>(from 86 more to 145 fewer)   | ⊕⊕⊕⊕<br>HIGH     |
| Eczema - overall - LGG to pregnant women & infants - eczema 18-24 mo |                   |                      |               |                      |                              |                      |                |                |                           |                                                     |                  |
| 3                                                                    | randomized trials | not serious          | not serious   | serious <sup>a</sup> | not serious <sup>a,b,c</sup> | none                 | 50/178 (28.1%) | 56/174 (32.2%) | RR 0.93<br>(0.49 to 1.76) | 23 fewer per 1 000<br>(from 164 fewer to 245 more)  | ⊕⊕⊕○<br>MODERATE |
| Eczema - overall - LGG to pregnant women & infants - eczema 36-48 mo |                   |                      |               |                      |                              |                      |                |                |                           |                                                     |                  |
| 2                                                                    | randomized trials | serious <sup>b</sup> | not serious   | not serious          | not serious                  | none                 | 30/118 (25.4%) | 41/118 (34.7%) | RR 0.74<br>(0.43 to 1.26) | 90 fewer per 1 000<br>(from 90 more to 198 fewer)   | ⊕⊕⊕○<br>MODERATE |
| Eczema - overall - LGG to pregnant women & infants - eczema 7 y      |                   |                      |               |                      |                              |                      |                |                |                           |                                                     |                  |
| 1                                                                    | randomised trials | serious <sup>c</sup> | not serious   | not serious          | not serious                  | none                 | 23/53 (43.4%)  | 41/62 (66.1%)  | RR 0.66<br>(0.46 to 0.94) | 225 fewer per 1 000<br>(from 40 fewer to 357 fewer) | ⊕⊕⊕○<br>MODERATE |
| Eczema - overall - LGG to infants only -eczema 2 y                   |                   |                      |               |                      |                              |                      |                |                |                           |                                                     |                  |
| 1                                                                    | randomized trials | not serious          | not serious   | not serious          | not serious                  | none                 | 26/92 (28.3%)  | 28/92 (30.4%)  | RR 0.93<br>(0.59 to 1.45) | 21 fewer per 1 000<br>(from 125 fewer to 137 more)  | ⊕⊕⊕⊕<br>HIGH     |

**CI:** Confidence interval; **RR:** Risk ratio

## Explanations

a. High heterogeneity (I<sup>2</sup> 72%)

b. In one trial unclear randomization and allocation concealment. In one trial high attrition (>20%)

c. In one trial unclear blinding of participants and study personnel
